# Supplementary material for: Cyanobacteria immobilised in porous silica gels: exploring biocompatible synthesis routes for the development of photobioreactors
Source: Royal Society of Chemistry journal article supplement (doi:10.1039/b923859j), 2010-01-01
Supplement: b923859j.pdf [file b923859j.pdf]

Type C and Type D (devoid of glycerol) hybrid gels with PCC 6301 are compared in this figure. The comparison of the UV-Vis spectra shows that the ratio in the intensities of the absorption bands is changed upon addition of glycerol, likely resulting from the adaptation of the cells, thus the relative amount of pigments, to their new environment.

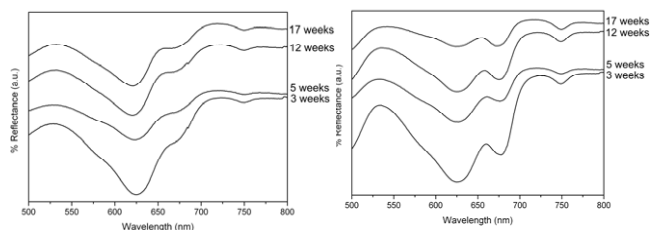

Reflectance mode UV-Vis spectra of cyanobacterial strain PCC 6301 immobilised in type C (left) and type D (right) silica gels as a function of time.
